# Supplementary material for: Organ Biodistribution of Radiolabelled γδ T Cells Following Liposomal Alendronate Administration in Different Mouse Tumour Models
Source: PubMed Central journal article supplement (PMC7064741; doi:10.7150/ntno.32876), 2020-02-06
Supplement: ntnov04p0071s1.pdf [file ntnov04p0071s1.pdf]

## **Organ Biodistribution of Radiolabelled $\delta\gamma$ T Cells Following Liposomal Alendronate Administration in Different Mice Tumour Models**

*Julie T-W. Wang<sup>†</sup>\*, Naomi O. Hodgins<sup>†</sup>, Wafa' T. Al-Jamal, John Maher, Jane K. Sosabowski and Khuloud T. Al-Jamal\**

Dr. J. Wang, Dr. N. Hodgins and Professor K.T. Al-Jamal  
150 Stamford Street,  
Institute of Pharmaceutical Science  
King's College London  
Franklin-Wilkins Building  
150 Stamford Street  
London SE1 9NH, UK  
E-mail: [khuloud.al-jamal@kcl.ac.uk](mailto:khuloud.al-jamal@kcl.ac.uk)

Dr. W.T. Al-Jamal  
School of Pharmacy  
Queen's University Belfast  
Whitla Medical Building Block 97B MBC Site  
Belfast, United Kingdom

Dr. Jane Sosabowski  
Barts Cancer Institute  
Queen Mary University of London  
London EC1M 6BQ, UK

Dr. J. Maher  
King's College London  
Division of Cancer Studies  
Guy's Hospital  
London SE1 9RT, UK

\* Corresponding author - E-mail: [khuloud.al-jamal@kcl.ac.uk](mailto:khuloud.al-jamal@kcl.ac.uk); [julie.tzu-wen.wang@kcl.ac.uk](mailto:julie.tzu-wen.wang@kcl.ac.uk)

## SUPPLEMENTARY FIGURES

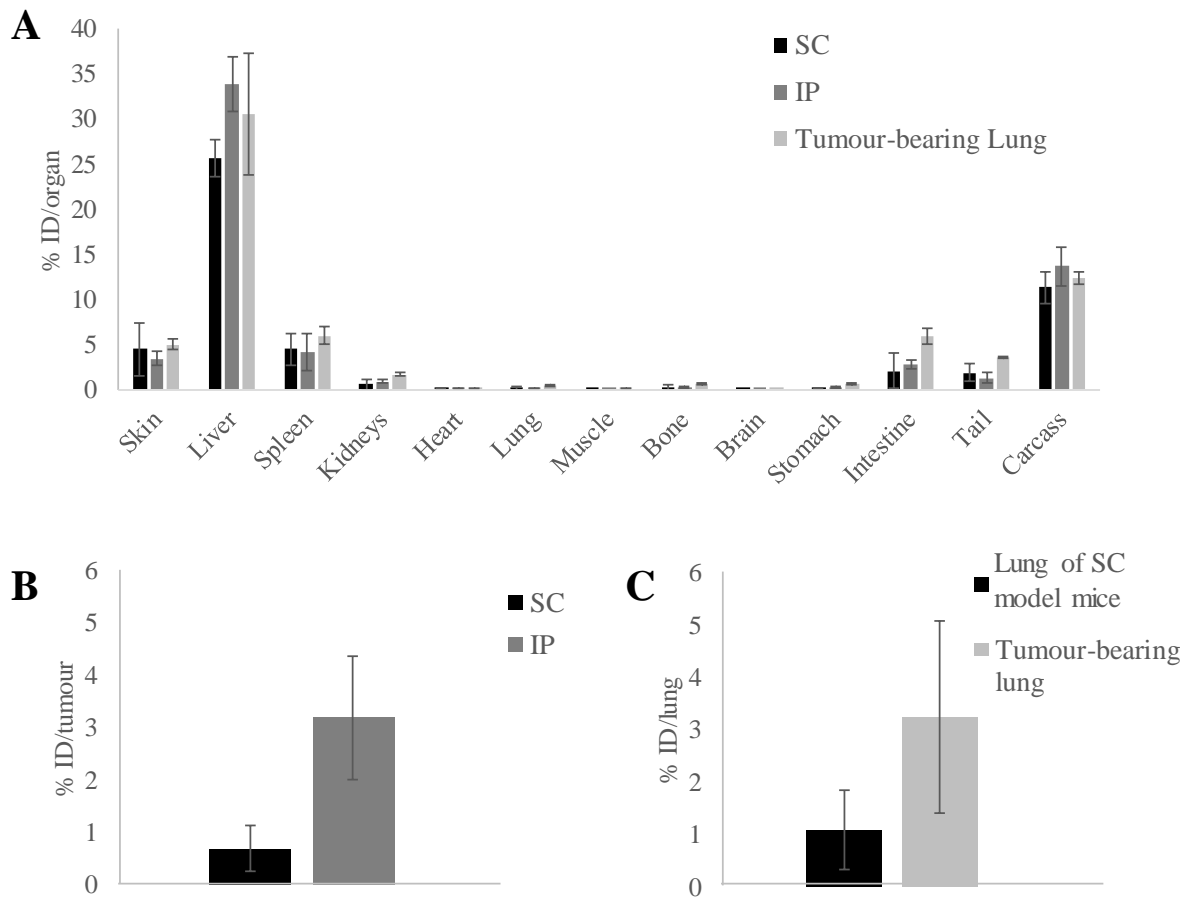

**Figure S1: *In vivo* Biodistribution of radiolabelled [<sup>111</sup>In]L-ALD in A375Pβ6 tumours, after single dose administration *via* tail vein injection in NSG mice.** NSG mice were inoculated with the A375Pβ6 cell line to form subcutaneous (SC), intraperitoneal (IP) or pseudo-metastatic lung tumours. Mice were i.v. injected with [<sup>111</sup>In]L-ALD at a dose of 2 μmol lipid/mouse. After 24 h the mice were sacrificed and the amount of liposomes was quantified by gamma counting. **(A)** Organ biodistribution of [<sup>111</sup>In]L-ALD expressed as per cent injection dose organ (%ID). **(B)** SC-tumour and IP-tumours uptake of [<sup>111</sup>In]L-ALD expressed as %ID. **(C)** Tumour-bearing lung and healthy lung uptake of [<sup>111</sup>In]L-ALD expressed as %ID. Data was expressed as mean ± SD (n=4)

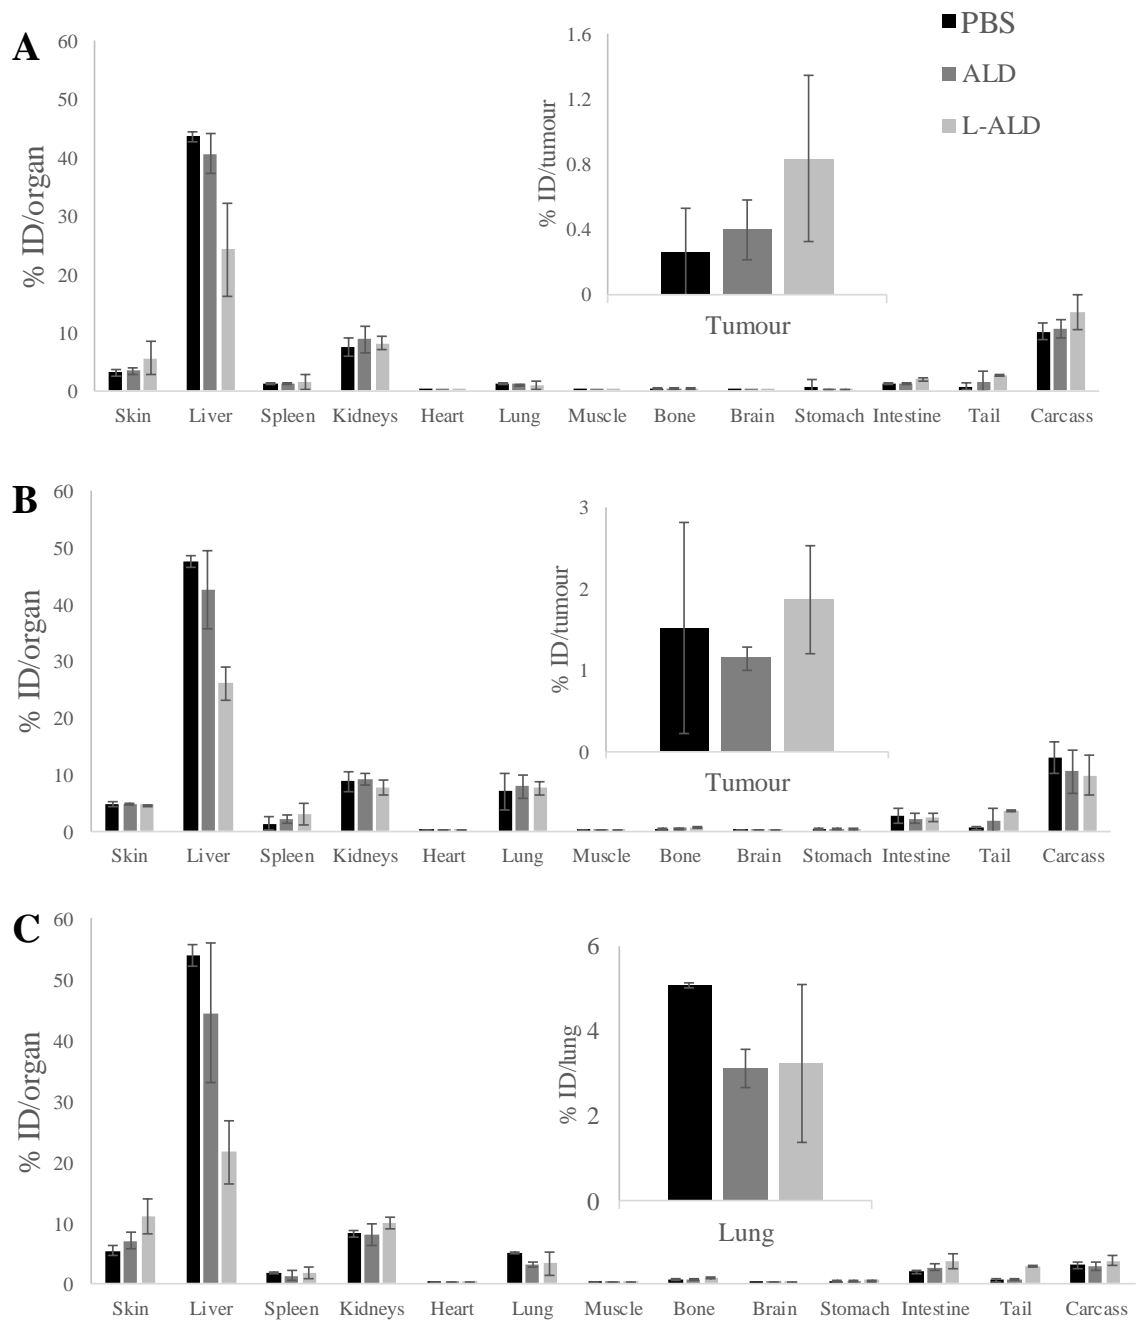

**Figure S2: *In vivo* biodistribution of radiolabelled  $\gamma\delta$  T cells in A375P $\beta$ 6 tumour bearing NSG mice, after single dose administration *via* tail vein injection.** NSG mice were inoculated with luciferase-expressing A375P $\beta$ 6 cell line to form (A) subcutaneous (SC), (B) intraperitoneal (IP) or (C) pseudo-metastatic lung tumours. Mice were i.v. injected with [ $^{111}$ In] $\gamma\delta$  T cells at a dose of  $5 \times 10^6$   $\gamma\delta$  T cells/mouse. Mice were pre-treated with 0.5  $\mu$ mol ALD or L-ALD, 24 h prior to injection of  $\gamma\delta$  T cells. After 24 h the mice were sacrificed and the amount of  $\gamma\delta$  T cells was quantified by gamma counting. Results are expressed as percentage injection dose (%ID) per organ. Data was expressed as mean  $\pm$  SD (n=4).
